# Supplementary material for: Effect of premolar extraction and anchorage type for orthodontic space closure on upper airway dimensions and position of hyoid bone in adults: a retrospective cephalometric assessment
Source: PeerJ. 2023 Oct 23;11:e15960. doi: 10.7717/peerj.15960 (PMC10601897; doi:10.7717/peerj.15960)
Supplement: Data S1 [file peerj-11-15960-s001.xlsx]

## Sheet: Sheet3
R	No.	Group	Age(سال)	time(ماه)	Sex	B-ANB*	A-ANB*	B-FMA*	A-FMA*	B-U1/SN*	A-U1/SN*	B-L1/MP*	A-L1/MP*	B-U1/FHp	A-U1/FHp	B-U6/FHp	A-U6/FHp	B-L6/FHp	A-L6/FHp	B-L1/FHp	A-L1/FHp	B-TGL	A-TGL	B-TGH	A-TGH	B-PNS-U	A-PNS-U	B-sp1-sp2	A-sp1-sp2	B-UPW-ptm	A-UPW-ptm	B-PNS-S	A-PNS-S	B-SPAS	A-SPAS	B-MPW-U	A-MPW-U	B-peb-eb	A-peb-eb	B-H-mpl	A-H-mpl	B-H-S	A-H-S	B-H-C3	A-H-C3	B-H-RNG	A-H-RNG	B-VAL	A-VAL
1	1	1	30	26	1	3.1	2.8	27.7	27.75	112.6	105.1	104.35	94.09	71.6	64.3	33.85	33.95	34.85	34.9	68.34	61.4	50.23	48	26.83	26.75	23	22.9	10.31	10.54	23.39	23.5	32.02	32	10.54	10.44	9.18	8.24	8.1	7	10.96	10.67	94.8	95	28.94	28.5	39.9	40	60.11	60.3
2	2	1	19	32	1	2.06	2.02	29.5	30	115.25	103.5	109.33	94	68.5	62	28.8	29	29.75	29.85	65.4	58.45	73.21	70.75	18.26	18.22	35.4	35.32	5.25	5.3	22.14	22.36	33	32.75	9.78	9.65	8.9	7.35	9.87	8.09	11.3	11	93.45	93.82	30.12	29.8	35.56	35.67	57.85	58
3	3	1	19	36	1	1.7	1.43	28.19	27.89	113.2	103	101.9	91.4	72.9	66.34	29.03	29.45	30.03	30.08	68.55	61.45	64.7	60.13	29	28.98	31.02	31	7.64	7.75	23.55	23.7	30.9	30.76	10.23	10.09	8.75	7.62	10.9	9	12.5	12.23	90.9	91.05	32.9	31.55	40.45	40.76	60.9	60.98
4	4	1	21	28	2	2.01	1.98	22.9	23	110.7	102.6	99.03	89.6	69	62	37.01	37.05	38.01	38.01	66.09	59.1	58.09	55.98	19.65	19.6	33.58	33.45	5.64	5.7	25.48	25.6	33.01	29.9	10.57	10.43	9.05	8.25	9.87	7.83	10.75	10.54	91.25	91.55	30.44	30.2	35.6	35.75	58.04	58.13
5	5	1	23	26	1	1.04	1	31.5	31	120.01	104.1	102.87	92.34	63.9	57.01	32.5	33.02	33.5	33.65	61.02	54.13	70.12	67	20	19.95	22.86	22.75	7	7.12	20.87	21	29.01	28.88	10.04	10	8.11	7.23	9.97	7.12	10	9.98	92.65	92.9	31.25	31	38.09	38.2	55.61	55.76
6	6	1	20	28	1	3.06	2.91	20.67	21	115	104.09	103.25	91.8	72	66	32.13	33	33.23	33.3	68.98	62	55.65	51.5	22.38	22.2	29.1	29	10.9	11	22.18	22.3	30.16	30	9.23	9.11	7.86	6.91	9	6.75	11.23	11.02	92.33	92.75	29.06	28.5	37	37.18	58.07	58.25
7	7	1	19	36	2	2.76	2.45	25.4	25.5	117.9	108	98.75	93.9	67.17	60.2	36.5	36.57	37.5	37.55	65.01	58	71.03	68.95	24.86	24.75	30.99	30.85	11.01	11.09	24.9	25	31.12	31.02	10.75	10.69	8.95	7.29	10.87	9.55	12.5	12.43	92.34	92.65	29	28.55	34.67	34.82	55.67	55.8
8	8	1	18	37	2	3.01	2.93	23.11	23	111.8	102.8	104.34	92.82	73.8	67	27.86	28	28.8	28.85	71	64.02	56.01	53.4	25	24.96	34.87	34.75	9.2	9.35	26.03	26.08	32.28	32.05	11.03	11	8	7.01	11.05	10	13	12.9	93.8	94.01	30.11	30	38	38.12	54.93	55
9	9	1	32	34	2	3.04	2.89	34.2	34.5	121.1	104.09	101.7	93.04	70.5	63.55	36.01	36.02	37.01	37.1	68.04	61.43	60.13	55.45	20.4	20.23	32.66	32.54	5.35	5.4	25	25.09	32.09	32.01	11.25	11.09	8.94	7.83	10	8.9	12.87	12.55	94	94.26	29.87	29	36.78	36.9	60.01	60.2
10	10	1	18	28	1	2.24	2.02	28.72	29	112.9	103.03	100.89	90.06	74.5	67.61	29.25	29.28	30.25	30.35	71.45	64.36	51.45	48.92	28	27.98	39	38.96	6.33	6.56	24.01	24.1	30.15	30	9.67	9.54	7.03	6.54	8.99	7.45	12.34	12.21	92.85	93	31.25	30.76	37.55	37.89	54.5	54.75
11	11	1	19	36	2	2.09	1.98	24.5	24.56	115.8	103.8	101.02	91.22	73.5	67.65	30.75	31.15	31.75	31.8	71	64.05	63.09	60.11	24.08	24.01	34.5	34.32	5.34	5.46	23.99	24.01	29.8	29.75	10.76	10.65	9	7.98	10.34	9.01	13.04	12.97	90.87	91.02	32	31.9	36.89	37	55.68	55.76
12	12	1	21	28	1	1.89	1.75	23.6	24	112.5	102.79	103.04	90	68.14	61.2	37.8	37.88	38.8	38.8	65.2	58.35	65	61.75	21.06	21	27.5	27.38	7.24	7.38	23	23	28.99	28.81	9.81	9.75	8.75	7.03	9.85	8.02	13	12.9	94.01	94.45	30	29.1	38	38.16	56.06	56.13
13	13	1	23	29	1	3.06	2.86	31.4	31.89	114.02	105	97.88	89.04	70.9	64	33.45	34.5	34.45	34.5	61	54.25	61.05	58	29	28.97	28.65	28.54	5.36	5.45	24.02	25.12	31.9	31.83	9.56	9.43	8.5	6.88	9.92	7.87	12.5	12.23	92.35	92.8	30.5	29	38.75	38.9	55.02	55.14
14	14	1	20	28	1	1.96	1.94	24.5	24.77	115	104.9	100.82	90.16	69	62.5	34.12	34.67	35.22	35.35	66.12	59.2	65.78	61.84	23.96	23.88	30.9	30.75	10.03	10.1	22.07	22.1	32.01	32	9.45	9.23	8.28	7.03	10.03	9	10.9	10.75	92.22	92.55	29.35	28.65	37.55	37.82	60.01	60.09
15	15	1	30	32	1	2.07	1.85	27.43	27.8	110.5	100.9	103.55	90.75	63.9	57	35.71	35.9	36.7	36.81	61	54.01	53.34	51.55	22.5	22.41	30.24	30.09	8.16	8.24	20.85	21.01	30.89	30.75	8.93	8.87	7.75	6.24	10	8.9	11	10.9	92.09	92.34	28.5	27.53	35.65	35.76	57.54	57.78
16	16	1	21	36	1	1.26	1.05	25	25.55	120.03	104.5	102.11	92.34	75.2	68.25	37.03	37.05	39	39	72.11	65.2	55	53.02	23.1	23.03	27.5	27.45	5.5	5.57	25.76	26	31.01	31	10	9.85	8	6.55	10.25	9	12.04	12	93	93.25	28.17	27.9	38.09	38.13	55.45	55.6
17	17	1	32	38	2	2	1.87	24.36	25	112.3	102.68	100.5	91.75	67.6	61.45	36.4	37	37.4	37.5	63.9	57	54.11	52.01	19.03	19	23.89	23.67	6.17	6.28	25.75	25.9	30.55	30.23	11.03	11	9.5	8.06	10.04	9	12.95	12.85	93.12	93.6	29	28.42	40.02	40.1	54.63	54.75
18	18	1	18	30	1	1.06	1	26.11	26.34	116.2	103.5	101.26	92.36	71.8	65.01	28.75	29.11	29.75	30	69	62.11	60.09	55.93	18.76	18.65	26	26	7.23	7.35	23.55	23.8	31.04	31.01	9.65	9.43	8.24	7.13	10	8.75	13	12.91	91.01	90.45	30.09	29.75	40	40.25	57	57.1
19	19	1	25	31	1	2.03	1.97	22.5	23.01	110.93	102.11	99.72	90.9	70.5	63.4	30	30	30.99	31	67.45	60.5	52	48.15	19.45	19.25	28.15	28.02	6.03	6.15	25.14	25.64	29.01	29	9.99	9.76	8	7.02	9.55	7.88	12	11.86	92.55	92.75	31.73	30.55	38.99	39.04	55.5	55.85
20	20	1	19	28	2	3.03	2.8	26.5	26.9	111.31	103.29	100.65	91.11	72.5	65.55	31.25	31.27	32.25	32.44	69	61.99	55.01	53.05	21.81	21.75	28.9	28.85	6.45	6.75	25.12	25.42	29	28.9	10.03	9.6	9.5	7.45	10.2	9.11	11.98	11.75	93.04	93.21	30.68	29.54	37.5	37.69	54.87	55
21	21	1	19	32	2	2.66	2.43	23.1	23.41	118.5	104.8	107.03	90.8	73.25	67.3	34.5	35	35.25	35.5	70.15	63.2	53	50.5	19.38	19.12	33.18	33.15	5.92	6.01	26.09	26.38	32.5	32.43	9.82	9.7	8.75	7.16	10.08	9.04	11.55	11.4	92.24	92.7	29.04	28.4	38	38.11	55	55.23
22	22	1	28	37	1	2.87	2.61	30.56	30.54	118	103.5	105.12	94.5	68.03	61.11	33.28	33.3	34.78	34.9	66	58.95	59.05	57	25.06	25.01	34	33.98	6.39	6.46	19.84	19.9	30.06	30	10	9.79	9.03	7.11	9.89	8.65	11.5	11.03	93.03	93.75	28.15	27.66	39.11	39.28	54.35	54.45
23	23	1	23	33	1	1.97	1.8	21.78	21.55	116.73	104.81	103.09	93.36	73.09	66.1	29.08	29.1	30.08	30.2	71	64.03	54.3	52.01	28.03	28	33.5	33.42	6.34	6.75	20.25	20.55	31.12	31.05	9.01	8.93	8.25	7.09	10.2	9	10.56	10.29	92	92.5	30	29.01	38.9	39	57.5	57.78
24	24	1	29	36	2	2.09	2	33.41	32.98	113	103.4	101.35	92	69.08	62.1	31.25	31.28	32.25	32.25	66.05	59	58.17	55	22	22	38	37.98	7.19	7.22	25.61	25.7	29	28.95	10.5	10.28	8.66	7.45	10.98	9.12	11.25	11.03	91.9	92	31.23	30.9	40.01	40.1	55	55.5
25	25	1	18	35	1	2.61	2.55	30.45	30.2	120.31	104.5	104.8	90.61	63.9	58	38.01	38.5	39.01	29.15	61	54.95	54.08	51.95	26.98	26.78	34.2	34.08	6.45	6.5	22.75	22.9	28.75	28.6	9.87	9.75	8.11	7.35	9.5	8.4	10.56	10.42	90.87	91.04	30.9	29.75	38.5	38.76	54.13	54.35
26	26	1	19	34	1	2.02	1.84	32.9	32.5	114.8	102.78	100.54	92.9	71.82	65	30.91	31	31.91	32	68.9	62	56.22	53.8	29	29	27.5	27.43	6.28	6.34	23.04	23.24	29.02	29	9.65	9.55	8.5	7.04	8.75	7.03	10.49	10.23	90.54	90.85	32.99	32.04	37.66	37.75	60	60.3
27	27	1	22	28	2	1.92	1.87	28.5	28.03	119	103.5	103.2	94.01	67.77	60.9	32.45	32.5	33.45	33.61	64.8	57.75	64	60.17	27.41	27.3	27.65	27.54	5.85	5.9	23.96	24.01	30.12	30.06	10.13	10.02	9.35	7.42	10.9	9	10.34	10	93.04	93.37	32.09	31.92	37.45	37.6	55.04	55.14
28	28	1	24	28	2	1.8	1.65	27	27.31	120.11	105.08	100.81	93.9	78	72.15	33.75	34	34.75	34.9	75.03	68	57.6	55	25.68	25.55	26	26	6.29	6.38	26.02	26.1	28.75	28.65	10.54	10.42	9.75	7.48	10	9	11	10.98	90.03	90.18	31.14	30	39.85	40	56.98	57.01
29	29	1	27	36	1	1.5	1.39	25.04	25.1	113.5	102.97	99.07	91.89	70.5	64	27.9	30.1	28.9	30	67.55	60.9	61.69	59.38	28.22	28.13	31.02	31	6.33	6.45	23.85	23.95	29	28.94	10.87	10.75	9	7.5	10.03	9	11.65	11.3	90.66	90.95	29	28.55	37.89	38	57.03	57.26
30	30	1	21	34	2	3.5	3.42	26.08	26.17	110.75	103	98.9	91	73.5	66.44	26.5	26.55	27.5	27.8	70.8	63.75	71.55	67.39	28.09	28.05	33.61	33.54	8.7	8.92	24.12	24.2	30	29.86	10.9	10.74	9.04	8.11	10.45	8.95	13.5	13.32	92	92.5	30.15	29.43	38.04	38.25	58.11	58.29
31	31	1	41	36	1	2.5	2.36	25.12	25.44	121.4	104.5	101.9	90.75	62.75	56.01	33.15	33.65	34.15	34.22	59.8	53.68	66.14	61.27	22.95	22.8	30.5	30.39	7.12	7.34	23.77	23.84	30.85	30.75	9.82	9.65	8.75	7.99	10	8.55	11.65	11.45	92.5	92.75	30.98	29.5	39.12	39.3	54.98	55.01
32	32	1	22	38	2	2.04	1.88	24.01	24.11	117	103.11	103.11	90.98	64.5	58	37.6	38.15	38.6	38.75	61.45	54.5	63.06	60.09	18.65	18.58	31.28	31.21	6.05	6.11	25.55	25.85	30	29.85	9.45	9.25	8.14	7.23	9.98	8.34	12.09	12	93	93.42	31	30.05	38.45	38.61	55.09	55.28
33	33	1	21	29	1	1.74	1.56	24.5	24.67	117.51	103.4	100.09	91.25	66.75	59.9	38.9	38.91	40	40	63.4	56.55	70.1	65.43	26.12	26.09	27.5	27.45	6.28	6.38	20.71	20.8	28	27.9	9.02	8.96	8.04	7.17	8.95	7.8	12.16	12	90.76	91	29.75	28.9	40.02	40.16	56.7	56.83
34	34	1	19	32	1	3.11	2.98	23.5	23.5	113.43	100.9	104.07	92	71.55	66.43	33.25	33.75	34.25	34.35	68.61	61.7	57.68	54.55	19.3	19.22	24.39	24.29	5.46	5.65	24.02	24.31	30.04	30	9.13	9.01	8	6.75	9.96	7.67	12	11.85	91.25	91.43	30.77	30	39.26	39.55	55	55.2
35	35	1	33	36	2	1.69	1.54	22.87	22.85	115.23	103.62	100	94.02	72	65.01	33.15	33.19	34.15	34.2	69	62.35	63.19	60	20.75	20.65	28	28	6.87	6.9	24.63	24.75	31	30.9	10.85	10.6	9.23	7.35	11.09	10	13.04	12.85	92.35	92.67	30.09	29.47	39	39.1	58.19	58.35
36	36	1	26	29	1	2.34	2.12	26.61	27	110.15	101.9	94.9	93.02	69.01	63	30.65	30.68	31.65	31.7	65.98	59.48	60.01	58.2	22.47	22.35	30.9	30.75	6.43	6.75	22.11	22.8	30.61	30.12	9.75	9.45	8.36	7.09	10.1	9.05	12.04	11.76	93	93.25	32.09	31.68	38.77	38.9	55.64	55.89
37	37	1	20	28	1	2	1.88	22.5	22.62	117.9	103.45	101.6	92.55	66.23	60.3	26.55	27.35	27.55	27.75	64	57.09	65	62.45	23.5	23.41	31	30.9	7.09	7.28	23.05	23.25	29.1	29	9.61	9.45	8.48	7.12	10.5	9.01	11	10.93	92.5	92.74	32	30.75	36.78	36.93	60.09	60.2
38	38	1	31	34	1	3.06	3.03	24.63	24.56	120	104.6	100.33	91.45	63.95	57	28.01	28.35	29.01	29.09	61.11	54.2	64.81	60.9	28.12	28.09	30.75	30.65	7	7.11	22.24	22.56	28.5	28.04	9.93	9.45	8.15	7.55	9.17	8.23	10.85	10.55	91.75	91.9	31.45	30.03	36.75	36.91	59.7	60.01
39	39	1	20	37	1	3.65	3.55	27	27.3	123.2	105.01	102.53	92.03	62.5	55.35	36.04	36.05	37.04	37.12	60.55	53.67	64.19	60.55	26.07	26.02	30	30	5.67	5.8	23.48	23.55	30.09	30	9.75	9.63	8.38	7.45	9.65	8.06	10.5	10	90.8	91.03	31.6	30.88	38	38.2	54.03	54.26
40	40	1	22	28	2	2.78	2.66	28	28.2	115.5	100.5	98.12	90.3	66.08	60	35.4	36	36.4	36.4	63.75	56.8	56.03	50.75	26.28	26.11	29.75	29.6	6.23	6.39	27.01	27.23	30	29.82	10.72	10.5	9.76	7.98	10.56	9.24	11.45	11.04	91.56	91.75	31	29.56	41.03	41.26	55	55.12
41	1	2	18	28	1	3.11	2.98	26.5	26.75	110.6	101.85	99.09	88.7	71.09	64.1	34.01	34.05	35.01	35.12	69.8	63.85	54.29	51.5	23.61	23.5	26.5	26.45	6.75	6.8	20.15	20.39	29.5	29.18	10	9.55	9.08	7.45	10	8.75	12	11.9	90.88	91	32.48	31.5	39.15	39.27	56.9	57
42	2	2	21	29	2	2.16	2.02	22.5	22.78	108.65	99.6	96.5	86.8	70.6	63.75	24.67	24.79	25.67	25.9	66.55	60.6	70.07	63	28.01	28	25.04	25	6.76	6.81	25.1	25.24	31	31	11.01	10.9	9.87	7.56	10.09	9	11.59	11.22	92	92.05	29.55	28.04	38.93	40.04	54	54.5
43	3	2	23	37	2	1.72	1.43	23.1	23.3	108.11	100.01	100.9	90.05	69.01	63	38	38.9	39	39	67.01	61	56	54.01	22.55	22.15	22.89	22.76	7.89	8	26.45	26.5	31.04	31	11.35	11.03	9	7.55	11	9.55	11.56	11	92.45	92.6	30.9	29.13	39.01	39.32	55.81	55.9
44	4	2	24	39	1	2.1	1.98	20.4	20.48	109.5	101	99.1	91.2	70.8	64.01	27.55	28.01	28.55	29	67.6	61.55	65.4	60.85	26.01	26	30.65	30.54	8.45	8.54	23.75	23.8	30.05	30.01	10.5	10.25	8.78	7.9	9.86	7.43	12	11.89	93.04	93.26	31.2	30.45	40	40.25	57.09	57.23
45	5	2	19	33	1	1.14	1.03	23.81	24	110.03	101	100.03	90.8	70.5	63.5	34.75	34.8	35.75	35.8	67.45	61.4	60.69	58.03	24.6	24.55	34.61	34.53	8.01	8.12	19.8	20.01	28.55	28.4	9.02	8.94	8.04	7	9.96	8.16	13.04	12.98	92	92.32	32.98	31	38.6	38.93	60.1	60.25
46	6	2	20	38	1	3	2.92	24.8	25.01	109.6	100.75	101.14	91.56	71.4	64.5	31.9	32	33	33	68.02	62	56.01	54	19.83	19.74	30.82	30.59	8.25	8.34	24.06	24.2	29.02	29	9.88	9.51	7.95	6.93	10	8.69	11.25	11	91.45	91.7	31	30.04	39.75	39.8	55.86	55.9
47	7	2	19	31	1	2.76	2.45	21.41	21.61	108.01	99.95	99.17	90.05	65.4	59	29.01	29.8	30.01	30.45	62.01	55.95	61.85	58.07	20.95	20.8	26.34	26.25	6.75	6.89	22.7	22.8	29.5	29.34	10	9.75	9.04	7.15	10.04	9	12	11.84	90.86	91.03	30.65	29.74	37.82	38.03	57	57.41
48	8	2	32	38	2	3.03	2.8	27.23	27.33	108.01	100.32	97.25	88.07	63.45	56.5	28.6	28.76	29.6	29.75	60.33	54.5	64.33	60.94	22.8	22.51	28.15	28.09	7.04	7.13	25.09	25.2	30	30	11.5	11.05	9.03	7	10.55	9.13	10.75	10.6	93.08	93.28	28.75	27.55	37.56	37.78	58.09	58.32
49	9	2	30	28	2	3.14	2.89	25.03	25.12	109.6	100.01	100.87	90.83	65.4	58.55	25.45	25.5	26.45	26.5	62.12	56.2	59.25	57	25.09	25.06	29.5	29.38	7.12	7.27	24	24.1	32.06	32.01	11.08	10.89	9.5	7.22	10.1	9	11.37	11.2	93	93.25	29.56	27.8	38	38.1	55	55.09
50	10	2	29	28	1	2.14	2.01	24.33	24.45	108.9	99.78	101.67	95.71	63.12	57.2	26.75	27.1	27.75	28	60.08	54.11	55.1	52.33	18.75	18.6	30	30	6.73	6.98	22.75	22.9	28.9	28.75	10.03	9.85	9	7.13	10.04	8.97	11.9	11.27	92.45	92.74	30.75	28.29	39.09	39.28	54.2	54.34
51	11	2	19	29	2	2.13	1.98	23.02	23.12	107	101.2	100.17	89.13	60.12	54	30.8	31.25	31.8	31.8	57.2	51.25	70	66.78	19.45	19.23	31.02	31	8.03	8.15	23.76	23.98	30	29.81	10.9	10.71	8.99	7.09	9.85	8.43	12	11.83	92.19	92.4	30.04	29	38.9	39.04	56.73	56.9
52	12	2	31	32	1	1.89	1.85	27.2	27.41	109.06	100.5	99.05	90.5	70.25	63.3	25.6	25.75	26.6	26.85	67.3	61.5	64.38	62.25	20.9	20.75	27.18	27.01	6.54	6.6	22.62	22.8	30.02	30	9.63	9.35	8.03	7.11	10	8.55	13.06	13	93.06	93.12	30.18	29.06	39.14	39.41	57	57.24
53	13	2	22	28	2	3.03	2.78	24.91	25.05	111	101.13	98.75	87.26	58.9	52.75	26.25	26.9	27.3	27.3	55.86	50	55.29	51.89	26.23	26.1	34.05	34.01	7.01	7.13	23.95	24	31	30.95	11.1	10.98	9.04	7.02	10.9	9	12	11.82	92	92.45	32	30.9	40.09	40.28	56.04	56.38
54	14	2	24	37	2	1.96	1.84	21.03	21.24	107.88	101.5	97	86.7	68.31	61.5	24.12	24.25	25.1	25.23	65.4	60.01	64	61.23	26.09	26.05	30.56	30.45	5.67	5.75	27	27.12	32.24	32.07	10.98	10.76	9.83	7.9	10.66	9.81	11.75	11.54	93.09	93.56	31	29.95	39.12	39.25	54.98	55
55	15	2	23	35	1	3	2.87	20.9	21.09	108.13	99.75	101	91.32	70.16	64.2	27.04	27.96	28.04	28.1	67.03	61.03	66.75	63.08	26.11	26.07	33.4	33.36	7.01	7.19	18.67	18.7	30	30	9.05	8.95	8.02	7	10.2	9	11	10.75	91.25	91.5	31.02	30	39.4	39.55	55	55.21
56	16	2	24	36	1	3.04	2.9	20.12	20.26	109.1	100.15	99.01	88.75	71.6	65.55	25.5	26.15	26.5	26.5	68.45	62.3	63.02	60	24.02	24	29.05	29.01	5.34	5.55	22.3	22.46	28.5	28.03	9.98	9.75	8.55	7.45	10	8.9	11.69	11.45	90.55	90.78	31.09	30	38.66	38.8	60	60.1
57	17	2	27	29	1	2.24	1.99	26.04	26.04	110.5	102.5	98.5	87.6	65.44	58.5	23.98	24	25	25.5	62.35	56.4	53.14	50.22	26	25.98	32.66	32.54	6.5	6.78	20.95	21.05	29	28.85	10.5	10.23	9.76	7.89	9.87	7.45	12.5	12	91	91.2	30.67	29.05	38.9	40.03	60.12	60.35
58	18	2	22	38	1	2.09	1.98	22.8	23	107.03	100.9	97.6	87.98	63.2	56.45	24.66	24.72	25.6	25.6	60.25	54.31	66	62.5	23.5	23.45	33	33	6.92	7	22.15	22.3	29.75	29.09	10	9.45	9.03	7.15	10.02	9	12	11.9	92.24	92.9	30.44	29.1	39.12	39.31	55	55.24
59	19	2	21	25	1	1.89	1.69	27.01	27	108	99.56	97.04	88.01	62.9	56	26.76	27.1	27.76	28	51	45.25	65.08	61.75	26.1	26	30.61	30.5	6.43	6.5	19.8	19.9	30.64	30.16	9	8.75	8.55	7.63	10.32	9.04	11.78	11.25	91.5	91.83	29.85	28.15	38.9	40	54.9	55.01
60	20	2	20	28	1	1.92	1.8	20.79	20.81	109.4	99.34	99.03	90.05	62.45	56.3	29.01	29.55	30.01	30.09	59.32	53.09	70.94	67	21.82	21.72	31.7	31.59	5.68	5.79	20.17	20.3	31.25	31.02	9.84	9.46	8.67	7.55	10.96	9.68	11	10.78	92.33	92.85	30.75	29.08	39.85	39.9	55.08	55.27
61	21	2	19	36	1	1.8	1.6	24.55	24.85	108.03	101.9	100.06	91.3	60.9	54	22.13	22.3	23.13	23.2	57.85	52	61	55.95	22.59	22.44	30.03	30	5.5	5.65	23.45	23.55	32.04	32	9.5	9.3	8.76	7.28	10	9	12.3	12.09	92	92.5	31	29.9	40.01	40.15	54.67	54.75
62	22	2	35	43	1	1.5	1.33	22.61	22.7	105.95	98.52	98	87.5	67.02	61.1	23.76	24.42	24.76	24.85	64	58.03	60.26	58	21.04	21.01	27	26.87	6.33	6.59	22.1	22.4	29	28.79	10	9.72	9.34	7.09	9.98	8.45	12	11.84	93.45	93.78	30.5	29.55	38.63	38.9	57.87	57.9
63	23	2	23	35	2	1.55	1.46	22.87	22.89	107.95	100.7	96.5	88.6	61.11	54.25	26.03	26.4	27.03	27.28	57.03	51.24	68.24	66.04	24.81	24.76	30	30	6.05	6.12	23.44	23.64	32	32	10.11	10	9.04	7	10.13	9	11.34	11.05	93	93.16	29.11	28	39.04	39.29	57.03	57.53
64	24	2	22	32	2	2.5	2.29	22.03	22.09	109	100.82	98.03	90.01	60.43	54.43	24.3	25	25.3	25.45	58.55	52.45	65.14	63.2	28.01	28	30	29.95	6.38	6.45	25.06	25.13	32.09	32.01	11.09	11.01	9.18	7.45	10	8.75	10.9	10.74	92.09	92.37	28.75	27.4	39	39.12	55.12	55.34
65	25	2	25	27	1	2.84	2.68	20.95	21.03	110	101.7	97.01	87.09	71.15	65.23	25.19	25.9	26.19	26.3	68.25	62.06	70.11	67.34	22.07	22.02	31.47	31.2	6.14	6.28	20.09	20.25	29	28.83	11	10.85	9.6	7.22	9.97	7.85	11	10.9	91	91.25	29	27.45	38.04	38.31	56.09	56.34
66	26	2	22	29	1	1.84	1.56	23.9	24	111.09	101.26	100.08	90.75	65.02	60	23.5	24.3	24.5	25	62	56.07	69.01	67	20.9	20.83	28.7	28.56	8.04	8.16	23	23.2	30.15	30	10.03	10	9.02	7.31	10	8.75	12.05	12	90.75	91	30	28.5	39.04	39.25	59	59.3
67	27	2	26	27	2	3.11	3	26.75	26.9	110.2	101.9	96.5	87.8	63.8	56.9	22.95	23.2	24	24	60.75	54.8	63	60.42	23.55	23.34	25.5	25.41	7.53	7.64	24.05	24.12	31.12	31.06	11	10.84	9.5	7.25	9.87	7.34	13.05	12.93	90	90.68	32.9	31	39.18	39.3	58.04	58.12
68	28	2	27	28	2	2.13	1.97	20.8	21.03	109.05	100.38	97.18	88.01	65.02	59.6	25.06	25.85	26.06	26.1	62.11	56.2	59.65	55.89	24	23.95	23.98	23.85	9.01	9.16	22.35	22.4	32.04	32	10.45	10.02	9.34	7.11	9.86	7.42	12	11.86	91.26	91.5	31	29.95	38.66	38.85	56.09	56.38
69	29	2	27	30	1	3.43	3.32	21	21.2	108.5	99.81	97.5	87.5	63.4	56.1	24.13	24.9	25.13	25.24	60.25	54.39	63.86	60.9	22.75	22.65	27.54	27.43	5.63	5.78	19.86	19.9	28.7	28.55	9.72	9.55	8.55	7.63	9.5	7	11.86	11.62	93	93.44	30.6	28.64	39.56	39.69	55.8	56
70	30	2	26	32	1	2.56	2.43	24.5	24.67	110.9	102.9	98.76	89.01	64.9	58.01	22.38	22.75	23.38	23.45	62	56.17	57.09	54.61	21.84	21.7	29.28	29.02	6.41	6.7	20.66	20.6	29	28.75	10	9.67	9.12	7.04	10.66	8.75	12	11.5	92.28	92.89	30.18	29	39.5	39.86	56.3	56.45
71	31	2	25	33	1	2.77	2.61	23.9	24.04	108	101	99	87.67	65	59	25.4	26	26.4	26.55	62.26	56.23	61	57.5	20.67	20.58	31.22	31.18	7.68	7.75	23.04	23.05	28.65	28.43	10.34	10	9.06	7	10	8.9	13.01	12.81	92	92.21	29.55	28.18	38.17	38.41	54.11	54.28
72	32	2	20	36	2	1.87	1.8	22.87	23	109.5	100.08	97.83	88.01	70.12	64.01	23.8	24.4	24.8	24.8	67.3	61.55	62.5	60	25.1	25	30.72	30.62	7.03	7.12	24	24	30.01	30	11.25	11.02	9.87	7.9	10.45	9	11.25	11	91.55	92.03	29.04	28	40.09	40.2	54	54.3
73	33	2	19	35	1	2.18	2	22	22	110	102.6	96.59	87.44	66.5	60.3	22.64	23.25	23.64	23.7	63.45	54	67.11	65.2	24.39	24.3	23.4	23.28	6.77	6.89	22.01	22.04	28.9	28.54	10.45	10	9.25	7.1	10.04	9.01	10.69	10.09	92.3	92.75	30	29.03	39	39.24	55.06	55.49
74	34	2	32	34	1	2.71	2.65	25.02	25.12	108.8	103.01	98.88	87.95	63.9	57	23.01	23.5	24.01	24.09	61	55.08	59.9	57.45	22.55	22.4	31	31	8.02	8.17	23.55	23.67	29.4	29.13	10.23	10.04	9.04	7	9.98	7.95	11	10.94	92.11	92.68	30.65	29.1	38.75	38.93	60	60.5
75	35	2	23	28	1	1.52	1.37	24.17	24.28	109.9	101.21	101.02	91.06	67.1	60.82	22.85	22.9	23.85	24	64.12	58.02	64.87	60.45	23	23	30.65	30.49	9.12	9.23	24.01	24.1	28.44	28.21	10	9.56	8.99	7.55	9.5	7.23	11.56	11.05	90.46	90.5	31	29.15	40	40.1	56.07	56.48
76	36	2	22	41	2	1.8	1.65	22.01	22.17	110.8	102.14	100.05	90.75	63.04	56.1	20.59	20.76	21.6	21.75	60.1	53.75	72.04	70	27.01	27	26.5	26.39	7.61	7.72	24.55	24.68	31.12	31.09	9.5	9.07	8.78	7.65	10.45	9.04	11.35	11.13	91	91.53	32.06	30.25	39.5	39.85	54.83	55
77	37	2	21	29	1	1.55	1.39	23	23.25	109.5	101.05	100.12	91	62.54	56.7	22.01	22.8	23.01	23.05	59.65	52.8	70.6	68.02	25.12	25.1	27.6	27.54	10.45	10.58	23.61	23.7	30.08	30	9.84	9.71	8.01	7.01	10	8.65	12	11.65	92.5	92.9	30.51	29	38.7	38.91	56.9	57
78	38	2	25	33	2	1.15	1.02	20.9	21	110.01	103.6	98.99	89	60.9	54.75	24.95	25.3	26	26	57.85	52	64.72	61	20.1	20	29	29	6.76	6.84	25.45	25.5	31.11	31	9.12	8.95	7.85	6.55	9.5	7.01	12.95	12.67	92.06	92.65	30	28.99	35.98	36.03	55.06	55.29
79	1	3	24	30	2	2.5	2.29	21	21.14	107.5	100.31	93.9	85.06	70.25	65.3	31.85	33.25	32.85	34.8	57.3	53.45	72.09	72	19.33	19.05	30.08	30.01	7.08	7.35	25.13	25.2	30.9	30.75	10.34	11.45	9.11	10.45	10.3	10.45	13.05	13.4	92.14	92.55	31.2	31.04	38	38.17	54.13	55
80	2	3	30	29	1	2.04	1.98	20.66	20.98	105	98.6	95.5	90.9	65.9	61.75	30.91	33	30	32.55	62.75	58.7	63	62.7	21	21	31.5	31.39	6.45	6.75	22	22.1	28.9	28.8	10	10.98	8.79	9.9	10.9	10.98	13	13.25	90.8	91	28.9	28.1	39.04	39.11	56.72	57.03
81	3	3	31	32	2	1.64	1.56	30.92	31.08	106	99.91	94.6	88.07	60.31	56.1	32.45	33.8	31.45	33	57.22	53.55	71.45	71.02	20.63	20.55	34.16	34.05	8.03	8.18	24.43	24.5	29.54	29.3	11.65	12.31	9.56	10.23	10.07	10.27	12.78	13	91	91.09	28.75	28.02	39.71	39.9	55	57.03
82	4	3	23	30	1	3.11	2.98	26.5	26.92	108.98	100.9	95.02	89.5	68.16	64.03	30.75	32.5	31.75	33.05	65.4	60.55	73.86	73.75	19.75	19.6	31.23	31.09	8	8.23	23.15	23.2	30	29.75	10.92	11.2	9.13	10	10.04	10.25	13.09	13.45	92.35	92.7	30	29.55	40.08	40.2	54.5	56
83	5	3	20	38	2	3.1	2.8	24.11	24.33	109	100.02	94	90.54	69.6	65.01	27.09	28.9	28.1	30	66.41	61.8	68.33	68.01	22.85	22.74	28.4	28.28	7.55	7.65	27.01	27.04	30	30	10.15	11.09	9.04	9.98	10.25	10.3	12	12.35	93	93.24	29.55	29.01	38.4	38.55	57.01	58
84	6	3	29	26	1	2.06	2.02	24.7	25	106.9	99.08	96.53	89.53	55.44	51	26.5	28.46	27.5	29.45	52.5	48.01	64.89	64.71	27.01	27	22.38	22.12	6.81	6.9	20.9	21	28.55	28.4	9.83	10.54	8.05	9.45	9.11	9.2	11.6	12	92.46	92.65	28.54	28.23	38.01	38.23	54	55.02
85	7	3	30	28	2	1.7	1.43	23.6	23.81	106.5	100	95.41	89.55	63.2	59	33.25	34.5	34	35.95	60.25	56	55.46	55.04	25.5	25.43	29	29	8.43	8.56	23.4	23.4	30	29.77	10	11.23	8.05	9.75	10.95	11	12.09	12.34	94.11	94.5	28.5	28.4	36.7	36.65	60.02	61
86	8	3	19	29	1	2.02	1.98	31.5	31.87	105.02	99	95.25	87.95	62.9	58	32.36	34	33.36	35.3	59.95	55.55	74.09	74	25.04	25	23.45	23.28	6.75	6.89	21.05	21.1	28.03	28	10.23	11.09	9.08	10.02	9.85	9.9	12.56	12.8	93	93.28	29	28.9	34.76	34.9	59.07	60.23
87	9	3	33	36	2	1.24	1	22.19	22.23	106.07	98.87	96.75	90.01	62.45	58	30.9	33	31.9	34	59.35	54.21	72.35	72.01	22.39	22.3	25.66	25.57	10.03	10.15	22.86	22.96	30	29.89	11	12.04	9.16	10.15	10.85	11	13	13.22	94.02	94.15	30	29.91	38.61	38.9	58.66	60.54
88	10	3	22	38	2	3.06	2.91	25.6	25.8	107	101.05	97.9	90.12	60.9	57.25	33.25	35.01	34.25	36.3	58	53.75	73.19	73	24.5	24.39	23.04	23	6.55	6.76	24.09	24.1	31.01	31	11.65	12.03	9.23	9.89	10.04	10.23	12.98	13.1	90.87	90.9	30.1	29.98	36.75	37.04	55	57.04
89	11	3	21	36	1	2.76	2.45	27	27.2	105.92	98.5	95.04	89.45	63.02	59.2	33.15	35	34.15	36.2	60	55.5	72.6	72.51	25.01	25	27.1	27	6.54	6.8	20.91	21.02	28.09	28	10.02	11	8.93	9.67	10.78	10.9	11.75	12.09	91.67	91.75	32.05	32	38.09	38.23	56.98	59.03
90	12	3	25	35	1	3	2.83	26.5	27	106.67	99	97.01	90.1	60.11	55.12	30.65	32.55	31.65	32.7	57.71	52.85	69.05	69	23.9	23.81	27.08	27.03	5.37	5.43	19.08	19.1	31.12	31.05	9.45	10.5	8.04	9	9.56	9.76	12	12.43	93	93.45	31.9	31.55	39.6	39.75	59.08	61
91	13	3	26	34	1	3.04	2.89	23.67	23.72	105.03	98	94.9	88.75	61.43	57.01	26.05	28.75	27.05	29.1	58.5	53.85	66.2	66.03	21.72	21.6	25	24.89	6.81	6.95	21.16	21.28	29	28.89	9.87	10.45	8.83	10.01	9.67	9.85	13.03	13.55	92.46	92.75	30.54	30.11	39.6	39.75	60	61.55
92	14	3	23	28	1	2.24	2.02	21.87	22	108.4	100.04	96.75	90.01	61.15	57.3	28.01	31	29.01	31	58.2	53.45	56.19	56.02	22	22	27.5	27.45	7.12	7.28	20.75	20.75	28.5	28.24	9.34	10.01	7.85	9.12	9.56	9.8	11.9	12.15	90.9	91	30.99	30.75	39.69	39.9	58.17	60.9
93	15	3	22	29	1	2.09	1.98	21.73	21.8	106.56	98.02	97.15	89.01	64.02	59.1	32.04	33.95	33.04	35.05	61.95	57	54.88	54.55	23.55	23.5	24.35	24.27	7.6	7.84	22	22.5	30.02	30	9	10.25	7.89	9.23	9.78	9.9	10.75	11.01	89.96	90.04	31.25	31	41.23	41.45	56.44	59.03
94	16	3	21	28	1	1.89	1.75	30.15	30.16	106.02	100.18	97.04	92.65	63.8	60	30.4	32	31.4	33.5	60.84	56.13	68.03	68	19.86	19.78	28.5	28.41	7.09	7.23	21.5	21.95	31.25	31.09	10.4	11	9.63	10.2	10.09	10.23	10.9	11.2	93.44	93.7	32.7	32.16	40.5	40.59	55.09	58.1
95	17	3	20	31	1	3.06	2.86	24.81	25	107.89	100.2	98.75	91.9	65.02	61.12	27.04	28.89	28.04	30.05	61.98	57	64.29	64.09	23.44	23.15	30.9	30.88	8	8.24	19.78	19.9	29.05	29	10.5	11.43	8.94	10.05	10	10.25	11	11.01	92.09	92.34	31	29.97	39.28	39.33	57	59
96	18	3	19	29	2	1.06	1.04	25	25.09	105.8	100	97.5	90.78	63.4	58.45	25.5	26.95	26.5	28.65	59.94	55	66.8	66.45	22.5	22.38	31	31	6.87	6.9	23.02	23.07	30.86	30.62	10	10.95	8.74	9.22	9.6	9.75	12.5	12.9	91.69	91.75	32.04	32	38.22	38.28	59.04	61.34
97	19	3	21	30	1	2.66	2.43	23.47	23.5	106.5	98.5	96.51	90.13	64.9	60	24.98	27	25.98	28	62	57.02	63.84	63.61	26	26	33.45	33.36	7.04	7.29	20	20.1	28.75	28.66	10.35	11	9.05	10.09	10.67	10.9	12	12.18	91.42	91.66	32.76	32.55	38.5	38.75	59	61.09
98	20	3	19	28	2	2.87	2.61	22.5	22.55	105.07	99.93	99.1	90.75	65	61.5	23.66	26.06	24.66	26.7	63	58.07	60.1	60.01	25.12	25.09	28.7	28.56	6.32	6.55	23.44	23.65	31.2	31.08	11.5	11.75	9.95	10.37	10	10.21	13.45	13.77	93.55	93.78	32	31.9	37.56	37.83	54.8	57.03
99	21	3	22	28	2	1.97	1.8	24.59	24.7	104.7	99	95.78	90.05	60.12	55.9	26.76	28.2	27.75	29.8	58.3	53.45	54.33	54.01	23.7	23.65	23.94	23.87	6.38	6.4	25.89	25.99	30.19	30.06	11	12.04	9.18	10.04	10.87	11	12	12.53	93	93.22	31.09	31	38.43	38.55	55	57.11
100	22	3	18	32	1	2.09	2	21.8	21.88	106	100.05	98.01	92.35	66.23	62.5	25.01	27.55	26.01	28	64.25	56.17	70	70	23	23	34.9	34.8	6.55	6.6	20.9	21.02	28	27.91	10.03	10.98	8.9	9.55	10	10.1	12.15	12.3	94.03	94.18	30.13	30.01	36.52	36.79	54.79	56
101	23	3	19	29	1	2.61	2.55	22.34	22.5	106.8	100	96.67	90.55	63.95	60.01	22.13	25	23.13	25.2	62	58	71.02	70.99	22.09	22.06	30.47	30.33	5.78	5.83	22.01	22.31	28.75	28.63	9.05	10.06	7.86	9.26	9.98	10	11.85	12.04	93.97	94	29.65	29.06	38.06	38.29	57.09	58.5
102	24	3	18	29	2	3.04	2.89	25.8	26	105.9	101	95.86	91	62.5	57.98	23.76	25.8	24.76	26.8	60.65	55.34	61.28	61	21.75	21.58	31.09	31.02	6.09	6.21	23	23.1	29.5	29.41	10.9	11.04	8.07	9.45	10.9	11	11.45	11.89	93.12	93.54	29	28.89	38.5	38.92	58	60.24
103	25	3	21	28	2	2.24	2.02	27.6	27.89	106.64	100	94.93	89.59	66.08	62	25.03	27	26.03	28.1	64.1	59.75	64.5	64.23	20.4	20.3	26.39	26.25	6.71	6.8	22.91	23.01	28.11	28.03	11	11.95	9.2	10.09	9.45	9.55	11	11.25	92.58	92.75	28.66	28.45	37.99	38.09	55.48	58
104	26	3	28	29	2	2.09	1.98	28.12	28.34	107.13	100.8	97.03	90.04	61.09	57.1	24.13	26.09	25.13	27	59	54.03	68	67.75	19.24	19.06	23.66	23.45	7.83	7.99	24.06	24.2	30.56	30.47	11.07	12	9.68	10.27	10	10.3	12.07	12.28	93.09	93.2	30	29.9	37.63	37.93	55.47	57.55
105	27	3	18	32	1	1.89	1.75	26.99	27.11	108.4	100.04	95.93	89.9	70.6	65.75	25.19	27.05	26.2	28.35	68	63.11	60.39	60.05	19.56	19.45	30.81	30.67	8.01	8.16	22.3	22.41	30.66	30.52	10	10.9	8.97	9.45	9.35	9.45	11.5	12	92.18	92.75	31.66	31.45	38.09	38.26	56.09	58.07
106	28	3	24	34	2	3.06	2.86	25.76	25.8	106.01	99	97.15	90.16	59.01	55.04	23.25	25	24.25	26.3	57	52.5	61.55	61.42	20.34	20.04	34.76	34.64	7.54	7.6	24.55	24.65	30.9	30.82	10.44	11.03	9.45	10.01	10.68	10.86	12	12.32	92	92.13	32	32	38	38.22	58.01	60
107	29	3	19	32	1	1.9	1.74	30.71	30.8	107.4	100.01	95.8	89.18	59.8	55.87	21.95	23.5	23	25.01	57.95	54	62.75	62.64	23	23	35.11	35.09	6.38	6.44	19.55	19.75	30.58	30.44	10	10.9	8.94	10	10	10.2	12.65	12.81	94	94.28	32.85	32.5	39.5	39.98	57.89	60
108	30	3	19	30	2	3.13	2.93	29.5	29.5	106	100	94.75	90.19	70.5	65.25	24.06	25.96	25.06	27.15	68.45	63.75	68.02	67.98	24.1	24	31.72	31.6	5.64	5.75	24.66	24.76	31.78	31.45	10.95	11.54	9.07	10	10.45	10.6	12.5	12.65	91.09	91.2	32.04	32	37.7	37.9	60.01	62.04
109	31	3	25	36	1	3.84	3.69	27.56	27.57	106.9	99	95	89.11	71.4	67	24.13	26	25.13	27.2	70	65.4	60.9	60.75	22.3	22.05	35.68	35.55	5.88	5.93	18.65	19.01	29	29	9.54	10.85	8.53	10.01	9.84	10	13.01	13.45	90.81	91	32	31.88	36.12	36.39	60.2	62
110	32	3	22	32	1	2.24	2.02	24.21	24.31	105.98	101	95.13	88.95	65.4	61.6	23.18	26	24.18	26.2	62.65	57.89	63.12	63.01	27.15	27.01	31.88	31.76	6.74	6.8	23.4	23.45	28.79	28.6	9.5	10.5	7.89	9.23	9.47	9.75	11.58	12.38	93.09	93.24	31.9	31.7	37.58	37.84	55.43	57.33
111	33	3	20	31	1	2.97	2.85	28.75	28.88	107.03	100.09	96.54	91.28	73.45	69.5	25.4	26.75	26.4	28.5	70.97	66	64.49	64.31	22.49	22.3	28.16	28.09	6.89	7.01	20.05	20.12	29	28.95	9.83	10.9	8.9	9.84	10.55	10.7	12	12.45	90.8	91	30.8	30.28	35.67	35.89	56.09	58.19
112	34	3	31	29	1	1.26	1.05	24.46	24.5	106.42	99.4	99.05	89.75	65.4	60.45	23.8	24.9	24.8	27	64.01	60	60.75	60.67	23	23	27.35	27.28	8.02	8.32	21	21	30	29.94	9.12	9.85	8.01	9.14	10.11	10.34	13.5	13.78	92	92.35	30.99	30.7	36.72	36.9	57.15	59
113	35	3	22	30	2	2.06	1.88	22.43	22.52	106.16	101	97.5	90.22	63.12	58.9	22.64	25.75	23.64	26	60.85	55.9	69	68.9	27.19	27.08	22.86	22.75	7.12	7.2	25.02	25.09	30.03	30	10.45	11.01	9.84	10.45	10.78	10.9	12.9	13.36	91.55	91.69	31.14	31.02	38.15	38.26	58.47	60
114	36	3	26	36	1	1.16	1.03	22.09	22.1	105.8	99	96.49	89.04	59.63	55	23.01	25	24.01	25.9	58	53.9	58.09	58	26.35	26.21	36.01	36	6.44	6.56	23.01	23.17	29	28.9	10	10.98	9.01	10	10.09	10.15	12	12.4	92.5	92.9	29.85	29.6	39.06	39.12	58.37	60.15
115	37	3	25	33	1	2.03	2.03	23.04	23.11	104.95	99.5	95.49	89.1	64.01	60.2	22.85	25	23.85	26	63.01	59	54.55	54.01	22.96	22.85	34.06	34.02	5.78	5.9	20.67	20.89	29.03	29	10	11.03	9.23	10.45	10	10.2	13.17	13.37	90.76	91.03	29.66	29.45	37.66	37.87	55.99	58
116	38	3	25	36	1	3.13	3	25.9	26.02	107.1	100	98.06	90.73	62.09	57	20.59	22.55	21.59	23.6	60.15	56.01	63.7	63.45	20.54	20.43	30.72	30.68	5.98	6.01	18.9	19.01	29.04	29	9.53	10.14	8.75	10	10.45	10.8	13	13.22	93.51	93.75	31	30.9	38	38.1	59.19	60.55
117	39	3	30	29	1	2.66	2.53	26.02	26.05	106.8	101	94.98	89.5	71.03	66.5	25.34	26.94	26.34	28.4	69.75	64.6	54.97	54.75	23.24	23.01	34	33.9	6.07	6.22	22.16	22.33	29	28.9	9	9.8	8.35	9.19	9.96	10.01	11.07	11.42	93	93.2	30.95	30.81	39.5	39.75	60	61.55
118	40	3	22	29	2	3.42	3.3	31.55	31.71	106.9	100.12	97.85	90	60.98	56.35	24.09	26.1	25.09	27.11	58.5	53.85	53.18	53.02	22.88	22.76	33.59	33.45	6.48	6.56	25.62	25.8	30.09	30	9.75	10.45	8.93	9.85	9.75	9.81	10.85	11	94.05	94.31	30	29.75	37.01	37.15	55.78	58.04
119	1	4	30	28	1	5.45	4.85	21.35	21.5	118.21	103	97.45	97.5	74.3	68	36.5	38.5	38.5	38.5	69.6	69.6	64.29	64.03	19.01	19	31.8	31.56	7.09	7.25	24.01	24.05	28	27.89	8.45	8	7.22	6.35	8.76	8.6	10.9	11.05	89.76	89.9	29.01	29	33.55	33.45	53.87	54
120	2	4	32	32	2	3.65	3.4	26.14	26.2	110.9	102.7	94.6	94.65	73.5	67.7	39	39.5	40.75	40.75	68.45	68.45	65.33	65.01	25	24.95	30.99	30.87	9.19	9.27	23.04	23.1	29.6	29.45	9.5	8.23	8.65	6.78	8.87	8.74	9.9	10.27	88.75	88.94	27.85	27.5	34.6	34.45	53	53.23
121	3	4	28	35	2	4.89	4.01	26.45	26.45	112.61	103.01	98.9	99	81.02	74.3	29.75	29.8	31	31	75.64	75.64	64.09	64	24.82	24.75	29	28.96	8.7	8.88	22.11	22.2	29.85	29.77	9	8.56	8.02	6	7.68	7.45	11	11.24	88.09	88.25	28	27.9	33.09	33.01	52.98	53
122	4	4	22	29	1	3.87	3.65	22.3	22.35	111.7	103	95.33	95.4	69.75	64	30.9	30.92	31.99	31.99	64.8	64.8	65.11	65.01	23.5	23.5	28.17	28.09	8.04	8.17	16.75	16.85	27.9	27.83	8	7.55	7.06	6.1	7.98	7.8	10.3	10.55	90	90.24	29.01	28.99	32.5	32.15	53	53.11
123	5	4	26	27	2	5.01	4.5	24.8	24.9	110	103.5	95.8	96	78.09	71.98	33.45	33.45	35.5	35.5	73	73.4	56.73	56.55	22.07	22.01	26.55	26.43	7.24	7.33	20.9	21.01	29	28.9	8.6	7.15	7.19	6.03	8	7.79	10.55	10.9	86.09	86.2	28.55	28.4	34	33.95	52.45	52.55
124	6	4	19	32	1	4.99	4.3	21.03	21.1	112.09	104.02	99.01	99.01	77.45	71.5	37.09	37.1	39.09	39.09	72.55	72.55	67.08	67.04	23.65	23.4	27.21	27	6.75	6.89	17.09	17.1	28.5	28.41	8.14	7.5	7.98	7	8.05	8.01	9.75	10.12	85.78	85.9	27.06	26.9	33.09	33.01	50.9	51
125	7	4	24	26	2	6.23	5.78	22	22.05	117.5	104.63	95.5	95.5	76.5	69.45	34.55	34.6	36.5	36.5	71.25	71.3	64.03	64	25.15	25.01	24.6	24.45	6.91	7.01	19.1	19.2	29.87	29.65	9.03	8.23	8.94	7.45	8.13	8	10	10.2	89	89.25	27.01	26.98	29.89	29.75	51.87	51.9
126	8	4	23	25	2	3.54	3.01	24.5	24.5	115.31	104.5	98.04	98.15	80	72.98	36.75	36.8	38.75	38.75	75.34	75.34	60.98	60.75	24.23	24.11	27.11	27.08	7.06	7.12	17.65	17.8	28.75	28.63	9.5	8.15	8.53	7.23	7.98	7.87	9.89	10.1	88.14	88.37	26.99	26.8	30	29.9	52	52.1
127	9	4	29	28	1	6.02	5.58	22.5	22.56	110.9	103.07	94.5	94.5	77.8	70.95	36.81	36.92	38.8	38.8	70.95	70.1	53.5	53.22	23.5	23.32	24.37	24.25	8.45	8.65	20.01	20.2	27.02	27	8.03	7.23	7.95	6.98	8.55	8.45	10.35	10.75	87.17	87.31	28.01	27.95	31.25	31.11	52.45	52.6
128	10	4	20	23	1	5.75	4.98	23.45	23.55	110.67	102.9	97.06	97.1	75.14	68.2	32.99	32.99	35	35	71.05	71.05	51.09	51	22.5	22.39	38.03	38	9.16	9.34	17.88	18	29	28.93	8.16	7	7.34	6.45	8.19	8.08	11.04	11.27	87.04	87.1	27.05	27	32.09	32.01	51.09	51.37
129	11	4	19	27	1	4.81	4.33	24.9	25	111.7	102.76	95.03	95.03	69.02	63	35	35	37	37	63.88	63.88	56.47	56.2	20	20	31.8	31.17	11.04	11.12	18.07	18.2	27.87	27.7	8.56	7.25	7.95	7.05	7.65	7.55	10.2	10.44	86.2	86.35	25	24.67	35.03	34.95	50.8	51
130	12	4	18	31	1	3.56	3.02	22.01	22.13	113.6	103.09	94.02	94.02	66	60.01	29.85	29.95	31.98	31.98	61.15	61.22	55.29	55.09	21.78	21.65	24.87	24.59	10.65	10.8	19.55	19.75	28	28	7.93	6.99	7.13	6.01	7.58	7.45	11.01	11.23	86.04	86.43	28.01	27.94	30	29.85	51.76	51.9
131	13	4	19	27	1	5.24	4.85	20.11	20.2	111.89	102.89	93.85	93.7	68.45	62.55	35.66	35.78	37.66	37.66	63.5	63.55	66.44	66.23	24.09	24.04	27.66	27.44	10.32	10.52	18	18	28.77	28.55	8.68	7.45	7.75	6.55	7.9	7.81	9.75	10.04	88.02	88.11	26.13	26	29	28.9	49.87	50
132	14	4	22	30	1	4.68	4	21.81	22	112.06	103.45	94	94	75.25	60	38.9	38.99	41	41	70.3	70.03	63.02	63	22	22	31.08	31.02	9.65	9.75	22.01	22.12	27.04	27	8.09	7.65	7.59	6.24	8.01	8	9.84	10.17	86.09	86.39	27	26.75	28.5	28.34	50	50.2
133	15	4	23	26	1	6.11	5.99	23.9	24	110	104.4	95.97	96	76.33	69.9	36.75	36.85	38.79	38.79	67.71	67.72	64.5	64.27	25.6	25.43	22.09	22.03	7.93	8.01	18.9	19	28.9	28.76	9.02	8.25	8.78	7	8.23	8.02	10.4	10.58	85.5	85.77	28.03	27.89	28.09	28	52.09	52.3
134	16	4	20	31	1	5.04	4.81	25	25	115.7	104.03	94.13	94.2	79.09	72.12	33.04	33.23	35.34	35.34	73.2	73.2	63.19	63.02	24.33	24.25	25.96	25.83	8.46	8.95	19.01	19.1	29	28.9	8.55	7.95	7.72	6.55	7.98	7.75	10	10.45	89.03	89.22	26.77	26.68	28.5	28.39	50.76	50.9
135	17	4	24	26	1	4.5	4	22.43	22.5	115	103.8	93.45	93.48	78.5	71.45	37.16	37.26	39.6	39.6	73.45	73.55	55.98	55.76	22	21.9	26.07	26.02	9.24	9.35	18.12	18.32	28.01	27.99	9	7.55	8.04	6	8.04	8	9.45	10	88.13	88.5	28.01	27.89	30	29.91	51.02	51.13
136	18	4	20	28	1	4	3.5	21.46	21.5	114.5	101.76	94.7	94.75	70.9	64	35.07	35.1	37.12	37.12	66	66	60.38	60.03	19.85	19.5	30.54	30.34	8.47	8.56	17.79	17.99	28	27.78	8.75	7.61	7.93	7	8.44	8.12	10	10.5	87.23	87.45	29.03	28.91	31.39	31.19	50.89	51
137	19	4	21	27	1	5.5	5.1	30.1	30.14	114.98	102.84	95.09	95.1	76.45	69.55	33.45	33.45	35.45	35.45	70.75	70.75	72.58	72.45	23	23	30.84	30.75	7.85	7.91	17.98	18.02	26.45	26.3	8.5	7.83	8.02	7.12	7.89	7.75	10.13	10.26	85.43	85.67	28	27.9	30.9	30.67	51.1	51.25
138	20	4	19	28	2	3.61	3.2	22.8	22.9	113.87	103.45	94.04	94.04	69.05	62.1	38.54	38.9	40.84	40.84	64.11	64.13	54.19	54.01	26.01	26	23.47	23.35	7.63	7.75	20.01	20.1	32.04	32	9	8.35	8.11	7.35	8.75	8.63	11.05	11.34	85.55	85.76	28.73	28.67	30.76	30.45	50.43	50.55
139	21	4	31	26	1	4.8	4.11	21.5	22	113.11	102.7	93.12	93.2	65.65	58.75	39.01	39.11	41	41	60.05	60.05	53.67	53.55	22.12	22	30.76	30.65	8.05	8.12	17	17	30	30	8.75	7.44	8.02	7.09	7.45	7.23	11	11.2	86.5	86.93	26.5	26.43	30.75	30.54	50	50.2
140	22	4	29	25	1	5.72	5.01	20.44	20.75	115	104.5	90.07	90.07	72.78	66	30.75	30.9	32.75	32.75	67	67	60.92	60.84	25.5	25.5	25.09	25.04	6.79	6.83	18.02	18.05	31.55	31.43	8.12	7.45	7.98	6.9	7.83	7.65	10.86	11	86	86.31	27.03	26.98	29.5	29.23	49.85	50.01
141	23	4	23	28	2	5.1	4.65	20.71	21	110.9	102.6	91.16	91.2	75.6	68.75	33.15	33.2	35.2	35.2	69.5	69.5	61.44	61.23	24.38	24.2	24.17	24.09	10.26	10.45	18.34	18.55	32.5	32.33	9.04	8.15	8.25	7.08	8.67	8.55	9.86	10	87.12	87.23	28.01	27.89	30	29.8	51.25	51.7
142	24	4	22	27	1	3.99	3.21	24.62	24.95	117.03	103.45	96.5	96.5	79	72.23	33	33	35.12	35.12	64.75	64.75	53.8	53.65	27	27	33.05	33.01	7.34	7.45	19.83	20.01	32	31.9	8	7.34	7.63	6.55	7.49	7.3	10	10.35	85.98	86.04	29	28.9	28.9	28.82	50	50.1
143	25	4	24	32	1	4.75	4.55	21.5	21.6	116.01	104.67	94.5	94.5	77.12	70.6	36.03	36.06	38.1	38.1	70.49	70.5	51.22	51.01	22.37	22.25	26.86	26.75	6.98	7.02	16.01	16.05	30.9	30.65	8.2	7.45	7.84	6.03	7.68	7.45	9.6	9.88	86.11	86.5	25.65	25.43	29	28.69	52.01	52.27
144	26	4	26	30	1	5	4.34	20.11	20.3	116.5	105	93.6	93.6	69.36	62.5	29.59	29.6	31.1	31.1	62.55	62.55	54.09	54	23.81	23.75	24.3	24.12	7.1	7.24	17.16	17.3	30	29.91	8.28	7.09	7.55	6.21	8.09	8	9.87	10.01	87	87.18	28.01	27.94	27.9	27.65	50	50.45
145	27	4	27	26	1	5.09	4.59	21.45	21.5	112.93	104.02	95.67	95.7	67.3	61.21	37.17	37.2	32.2	32.2	61.85	61.85	60	59.89	25.09	25.01	23.18	23.09	8	8.04	17.65	17.75	29.5	29.23	8.75	7.89	7.91	6.78	8.14	8.01	10.04	10.27	86.09	86.24	27.5	27.32	30	29.9	49.87	49.9
146	28	4	28	25	2	4.2	3.84	24.77	24.78	111.9	103.22	94.22	94.22	70.98	64.01	33.06	33.1	35.1	35.1	65.01	65.05	54.56	54.12	24.13	24.09	27.09	27.02	7.64	7.82	18.01	18.11	32.98	32.87	9.11	8.23	8.95	7.34	8.54	8.45	10.11	10.4	86.09	86.17	26.75	26.56	31.09	31	50	50.9
147	29	4	18	27	1	3.76	3.1	26.01	26.09	115.5	102.59	94.21	94.21	76.04	69.2	35.72	35.85	37.66	37.66	70.13	70.16	56.35	56.23	23.91	23.85	24.75	24.63	8.09	8.27	16.55	16.75	30	29.98	7.89	6.75	7.13	6.03	7.93	7.85	10	10.25	85.97	86.01	28	27.75	28.7	28.45	51.03	51.48
148	30	4	31	26	1	3.98	3	25.32	25.4	117.33	103.87	94.54	94.6	80.9	74	33.2	33.2	35.2	35.2	77	77	50.63	50.45	24.5	24.45	23.8	23.65	9.5	9.61	18.2	18.31	31.5	31.28	8.74	7.61	7.95	6.55	7.88	7.76	10.54	10.9	87	87.11	26.73	26.66	27.67	27.44	50	50.1
149	31	4	20	29	1	4.45	4	24.5	24.5	111.8	102.33	93.42	93.42	77.45	70.89	30.08	30.1	32.1	32.1	72.85	72.9	51.78	51.65	23.9	23.8	30.12	30.09	9	9.09	15.78	15.9	31	30.98	8.75	7.59	8.12	7.04	7.65	7.55	10.32	10.55	86.17	86.25	27.11	27.09	30.9	30.65	49.87	50
150	32	4	21	29	1	5.6	4.99	25.06	25.2	117.5	105.2	93.76	93.8	73.9	67.01	37.09	37.1	39.1	39.1	69.55	69.55	61.49	61.22	22.5	22.43	40.28	40.11	10.03	10.25	16.23	16.4	29.9	29.55	8.13	7.25	7.69	6.32	7.83	7.73	10.12	10.4	88.09	88.25	25.6	25.54	31.66	31.28	51.8	51.99
151	33	4	25	29	2	4.63	3.88	26.1	26.19	110.55	101.12	95.01	95.01	76.19	70.02	35.12	35.26	37.3	37.3	70.2	70.25	60.3	60.09	25.5	25.45	33.4	33.25	9.84	10	17.99	18	30	30	8.99	7.85	8.09	6.45	8.19	8.12	9.8	10.1	87.56	87.75	28.5	28.32	30.75	30.59	48.97	49
152	34	4	19	27	2	5.21	4.63	23.08	23.2	112.83	103.09	94.03	94.33	74.93	68.01	37.8	37.8	38	38	70	70	55.07	55	23.08	23	32.8	32.65	7.83	7.95	18.56	18.67	30.55	30.25	9	8.04	8.11	6.77	8.49	8.23	9.5	10.03	87.34	87.59	27.78	27.6	29.45	29.03	49.01	49.2
153	35	4	25	28	1	4.94	4.09	24.8	25	114.5	103.67	95.09	95.1	75.9	69	38.61	38.75	40.55	40.55	71.03	71.07	73.07	73.01	24	24	38.6	38.45	7.77	7.86	16.01	16.09	30	29.9	8.17	7.45	7.93	6.95	7.68	7.55	9.39	9.75	86.5	86.75	30.1	30	30.56	30.38	50	50.27
154	36	4	23	29	2	3.77	3.43	24.02	24.1	110.5	100.98	91.07	91.1	68.45	61.35	37.34	37.55	39.34	39.34	63.32	63.32	62.69	62.54	25.01	25	26.34	26.25	6.41	6.55	21.03	21.05	33.2	33.05	9.5	8.35	8.93	7.4	8.45	8.03	10.18	10.32	89	89.1	26.5	26.28	28.61	28.45	51.23	51.4
155	37	4	21	32	1	4.01	3.86	22.13	22.2	115.1	103.04	95	95	67.54	60.6	38.01	38.05	40	40	61.83	61.83	58.75	58.54	25.16	25.09	26.11	26.03	8.19	8.2	19.01	19.2	31	30.97	8.25	7.45	7.75	6.82	7.38	7.11	10.27	10.4	86.45	86.55	28.02	27.97	28.15	28.04	50.85	50.9
156	38	4	20	31	2	4.17	3.92	22.9	23	113.34	101.73	93.04	93.04	68.7	61.5	37.21	37.3	39.2	39.2	63.22	63.22	56.84	56.75	23.81	23.75	22	22	9.04	9.24	17.89	17.9	29.8	29.6	8.98	7.93	8.13	7.03	7.99	7.85	10	10.23	88.7	88.9	26.09	26	28.09	28.01	49.45	49.65
157	39	4	18	30	2	5.12	4.97	23.04	23.19	114.8	104.06	94.09	94.1	78.01	71.1	38.03	38.11	40.01	40.01	72	72	59	58.65	23.9	23.87	23.5	23.45	10.35	10.65	19.5	19.5	27.25	27.34	9.14	7.8	8.92	7.99	8.23	8.09	10.1	10.45	86.78	87	27	26.92	29	28.85	49.01	49.23
158	40	4	21	26	2	5.26	4.56	22.5	22.75	113.81	103.56	95.01	95.01	74.33	68	37.57	37.65	39.5	39.5	69.98	69.98	60.9	60	26.28	26.21	30.21	30	7.62	7.7	17	17.12	28	28.12	9.04	7.64	8.77	6.98	8.49	8.11	9.76	9.9	87	87.15	26.15	26.06	30.01	29.85	50.02	50.1
159	1	5	25	26	1	-2.89	-2.11	30.2	30.27	119.9	103.45	97.8	89.9	76.33	76.63	23.45	23.45	26.67	27.5	76.5	71.45	68.07	67	25.01	25.3	34	34	6.54	6.89	25.67	25.67	27	27	10.97	11	9.96	10.1	11.09	11	13.45	13.32	95.7	95.03	35.09	34	39.89	39.75	61.35	61.48
160	2	5	24	28	1	-1.49	-1	29.6	29.71	115	115.19	98.09	88.7	79.09	79.1	20.65	20.65	23.95	24.55	79.1	74.11	59.01	57.03	27.01	27.12	37.01	37	9.03	9.23	23.9	23.9	26.75	26.75	10.56	10.8	10	10.65	10.55	10.43	14.2	13.8	94.3	94.01	34.12	33.06	40.9	40.76	62.35	62.57
161	3	5	28	38	2	-2.03	-1.85	28.07	28.12	114.68	114.6	98.14	89.05	78.45	78.5	22.09	22.09	25.1	26.1	78.65	73.2	67.15	65.32	27.5	27.72	32.9	32.86	8.11	8.19	27.07	27.1	28	28	11.98	12	11.09	11.35	11.49	11.32	13.01	12.9	95	94.9	36.85	35.75	41.09	41	60	60.12
162	4	5	23	36	1	0	0.75	27.5	27.54	115.8	116	97.6	87.6	70.99	71	25.16	25.16	27.92	28.43	71	66.5	69	67.24	28.01	28	35.62	35.55	7.65	7.75	24.33	24.4	26.5	26.5	10.5	10.75	10	10.5	11.94	11.88	12.5	12	93.56	93.45	36	35.09	41.23	41.09	62.5	62.45
163	5	5	33	39	1	-2	-1.3	25.09	25.1	113.43	113.5	98.9	87.75	76.45	76.65	23.04	23.04	26.05	27.12	76.55	71.61	74.96	73	24.9	25	33.9	33.75	5.98	6.02	23.45	23.5	27	27	10.45	10.67	9.97	10.33	11.19	11.09	13.56	13.25	95.09	95	34.24	33	42	41.98	63.09	63.11
164	6	5	37	38	1	-1.09	0.5	27.61	27.8	110.5	111.5	97.5	91.51	69.05	69.15	20.09	20.09	23.1	23.75	69.1	64.33	70.98	68.55	25.13	25.2	27.8	27.65	6.74	6.88	20.5	20.5	30	30	10	10.2	9.5	9.85	10.65	10.55	13	12.9	96.11	96.03	29.98	28.2	42	41.67	62	62.43
165	7	5	32	28	1	-2.75	-1.25	32.1	32.19	118.9	119	96.98	89.13	68.65	68.75	21.45	21.45	23.45	24.15	68.84	64	69.01	65.42	25	25	36.55	36.32	8.9	9.01	21.67	21.67	27.66	27.66	11.25	11.63	10.03	10.68	11.78	11.65	14.09	13.9	95.39	95.09	30.67	29.55	40.87	40.75	61.95	62
166	8	5	29	29	2	-2.5	-1.5	30.09	30.2	119.2	119.2	95.2	89.35	72.78	72.9	20.63	20.63	24.5	25.6	73.01	68.05	59.08	55.75	26.01	26.2	36.1	36.02	7.13	7.25	24.03	24.03	31.25	31.25	11.96	12.01	11	11.45	10.97	10.85	14	13.9	89.94	89.5	34.5	33.38	38.9	38.76	63.14	63.25
167	9	5	26	27	1	-1.66	-1.06	30.88	31	118.02	118.5	97.8	88.71	75.16	75.23	19.89	19.89	20.9	21.35	75.94	71	74.01	73	24.01	24.15	34	34	6.38	6.44	24.87	24.87	27.12	27.12	10.76	10.9	9.95	10.05	10.98	10.87	13.56	13.24	93.9	93.76	35.88	34.78	39.6	39.35	64.55	64.6
168	10	5	29	29	2	-3.04	-2.89	28.5	28.54	115.05	115.1	96.81	89.05	79	79	25	25	28.12	28.9	80.01	75.01	71.5	68.75	24.05	24.1	32.98	32.6	7.81	7.92	25.11	25.11	30	30	11.87	11.95	10.89	11.04	11.56	11.44	14.2	14.09	94.02	93.75	33.01	31.98	39	38.95	64	64.2
169	11	5	23	28	1	-3	-2.56	27	27.01	117.9	118	98.6	87.75	76.5	76.75	23.45	23.45	26.05	26.9	77	71.25	70	68.9	26	26	33.5	33.29	6.3	6.46	23.77	23.77	28.94	28.94	10.5	10.78	9.98	10.24	10.59	10.43	13.66	13.52	94.55	94.38	29.9	28.85	40.98	40.72	63.85	64
170	12	5	26	34	1	-2	-1.55	28.09	28.1	111.9	112	96.75	87.5	80.45	80.65	20.19	20.19	23.2	24.01	80.75	75.9	75.74	72.09	34.45	34.6	34.75	34.6	10.4	10.57	22.87	22.87	29	29	10	10.25	9.86	10.2	11.04	11	14.2	14.06	93.49	93.3	32.7	31.56	40.16	39.95	64.02	64.15
171	13	5	25	38	2	-1.77	-1.34	30	30.09	120.01	120	97.4	90.44	77.8	77.88	19.45	19.45	22.56	23.45	78.1	73.05	70.9	67.82	25.95	26	32.67	32.53	9.39	9.45	25.6	25.6	31.25	31.25	12.25	12.4	11.5	12.03	12.75	12.66	12.87	12.75	95.11	95.04	34	32.9	39	38.9	63.85	63.9
172	14	5	24	28	1	-1.26	-1	25.5	25.5	115.9	116.01	97.65	87.6	75.14	75.2	21.5	21.5	22.85	24.67	75.55	70.45	65.45	62.35	27.61	27.75	26.09	20.03	8.11	8.24	22.9	22.9	27	27	10	10.23	8.99	9.26	10.69	10.54	14	13.9	93.47	93.34	35.05	33.89	39.65	39.45	64.03	64.3
173	15	5	24	37	2	-2.33	-2	24.89	24.9	117.53	117.6	96.16	90	69.02	69.12	23.01	23.01	25.1	25.98	69.02	64	67.85	64.5	28.01	28.2	36.15	36.09	7.56	7.7	27.82	27.82	28.9	28.9	11	11.2	10.03	10.9	11.93	11.8	12.9	12.75	94.9	94.85	34.16	33.07	40.56	40.48	63	63.12
174	16	5	27	36	2	-2.01	-1.79	28.9	28.9	116.12	116.3	95.6	86.5	67.86	67.9	22	22	24.03	24.95	67.88	63	69.08	67.15	23.01	23.11	37	36.87	6.29	6.34	22.45	22.45	30	30	11.29	11.45	10.95	11.24	11.24	11.09	11.78	11.6	93.58	93.44	33.28	32.09	40.12	40.02	62.25	62.41
175	17	5	29	29	1	-1.5	-1.2	33.5	33.66	110.87	111	95.88	86.45	68.45	68.7	25.61	25.61	28.55	29.23	68.55	63.6	74.26	70	30.01	30	35.43	35.39	5.75	5.8	25.9	25.9	27.6	27.6	9.95	10	9.02	9.85	10.65	10.55	13.56	13.44	94.11	94.08	34	32.96	40.67	40.48	60.9	61
176	18	5	27	35	2	0	0.81	27.65	27.8	118.63	119.01	97.04	90.19	75.9	75.9	19.98	19.98	23.49	24.11	75.89	70.87	70.56	67.83	24.4	24.7	30.69	30.4	6.01	6.12	27.5	27.5	28	28	11.9	12	10.55	11.05	11.39	11.22	13	12.8	94	93.81	32.58	31.47	38.55	38.49	61.85	61.9
177	19	5	37	34	2	-1.5	-0.98	25.5	25.6	117.12	117.2	98.03	87.98	81.23	81.4	21.34	21.34	24.05	24.94	81.05	76	71.25	69.04	26.76	26.76	33.45	33.26	7.5	7.68	24.85	24.85	29.01	29.01	12.03	12.15	11	11.65	11.95	11.85	14.09	14	95.01	95	33	31.97	39	38.9	62.55	62.78
178	20	5	32	30	1	-2.3	-1.89	26.44	26.7	113.7	113.8	95.09	88.5	78.9	78.9	20.55	20.55	22.85	23.25	79	72.35	69.85	65.28	24.5	24.75	24.09	24	7	7.13	23.45	23.45	26.5	26.5	10.56	10.7	9.98	10.2	10.61	10.45	13.67	13.5	93.39	93.25	34.07	33	39.04	38.92	63.09	63.16
179	21	5	25	32	1	-2.04	-1.8	28.03	28.08	115.84	115.9	96.52	88.53	75.49	75.67	23.78	23.78	25.8	26.14	75.65	70.75	73	71.25	20.9	21.05	35.19	35.09	7.83	7.98	24.5	24.5	27.14	27.14	10.55	10.76	9.87	10.32	10.94	10.75	13.92	13.73	94.75	94.67	33.75	32.56	39.62	39.44	64.12	64.36
180	22	5	23	37	1	-1.45	-1.02	29.11	29.43	113.9	114.02	98.55	91.29	78.5	78.54	22.4	22.4	25.14	26.01	79	72.45	71.27	70	26.36	26.58	34.1	34	8.09	8.22	25	25	28.01	28.01	10.61	10.85	9.12	10.09	10.55	10.25	12.77	12.35	95.12	94.98	34.15	33.03	40.07	39.96	64.3	64.45
181
182				سن=سال	1=زن
183			ماه	طول درمان=	2=مرد			موارد*= درجه
184							میلی متر	بقیه موارد=
185
186		4bi	BIMAX	G1		B=Before	pre
187		4bi	CL I. Max	G2		A=After	post
188		4bi	CL L.Mod	G3
189		2bi max	CL II div I	G4									SPAS-Pre	G1
190		2bi mand	CL III. Max	G5										G2
191														G3
192														G4
193														G5
194													SPAS-Post	G1
195														G2
196														G3
197														G4
198														G5
199
200
201
202
203
204
205
206
207
208
209
210
211
212
213
214
215
216
217
218
219
220
221
222
223
224
225
226
227
228
229
230
231
232
233
234
235
236
237
238
239
240
241
242
243
244
245
246
247
248
249
250
251
252
253
254
255
256
257
258
259
260
261
262
263
264
265
266
267
268
269
270
271
272
273
274
275
276
277
278
279
280
281
282
283
284
285
286
287
288
289
290
291
292
293
294
295
296
297
298
299
300
301
302
303
304
305
306
307
308
309
310
311
312
313
314
315
316
317
318
319
320
321
322
323
324
325
326
327
328
329
330
331
332
333
334
335
336
337
338
339
340
341
342
343
344
345
346
347
348
349
350
351
352
353
354
355
356
357
358
359
360
361
362
363
364
365
366
367
368
369
370
371
372
373
374
375
376
377
378
379
380
381
382
383
384
385
386
387
388
389
390
391
392
393
394
395
396
397
398
399
400
401
402
403
404
405
406
407
408
409
410
411
412
413
414
415
416
417
418
419
420
421
422
423
424
425
426
427
428
429
430
431
432
433
434
435
436
437
438
439
440
441
442
443
444
445
446
447
448
449
450
451
452
453
454
455
456
457
458
459
460
461
462
463
464
465
466
467
468
469
470
471
472
473
474
475
476
477
478
479
480
481
482
483
484
485
486
487
488
489
490
491
492
493
494
495
496
497
498
499
500
501
502
503
504
505
506
507
508
509
510
511
512
513
514
515
516
517
518
519
520
521
522
523
524
525
526
527
528
529
530
531
532
533
534
535
536
537
538
539
540
541
542
543
544
545
546
547
548
549
550
551
552
553
554
555
556
557
558
559
560
[truncated: 1 more columns]
