# Supplementary material for: Effect of premolar extraction and anchorage type for orthodontic space closure on upper airway dimensions and position of hyoid bone in adults: a retrospective cephalometric assessment
Source: PeerJ. 2023 Oct 23;11:e15960. doi: 10.7717/peerj.15960 (PMC10601897; doi:10.7717/peerj.15960)
Supplement: Supplemental Information 3 [file peerj-11-15960-s003.xlsx]

## Sheet: Sheet1
	No.	Q1( ֯ )	Q2( ֯ )	Q3( ֯ )	Q4( ֯ )	Q5 (mm)	Q6(mm)	Q7(mm)	Q8(mm)	Q9(mm)	Q10(mm)	Q11(mm)	Q12(mm)	Q13( ֯ )	Q14(mm)	Q15(mm)	Q16(mm)	Q17(mm)	Q18(mm)	Q19(mm)	Q20(mm)	Q21(mm)	Q22(mm)
	1a	1.52	24.17	109.9	101.02	67.1	22.85	23.85	64.12	64.87	23	30.65	9.12	24.01	28.44	10	8.99	9.5	11.56	90.46	31	40	56.07
	2a	1.8	22.01	110.8	100.05	63.04	20.59	21.6	60.1	72.04	27.01	26.5	7.61	24.55	31.12	9.5	8.78	10.45	11.35	91	32.06	39.5	54.83
	3a	1.55	23	109.5	100.12	62.54	22.01	23.01	59.65	70.6	25.12	27.6	10.45	23.61	30.08	9.84	8.01	10	12	92.5	30.51	38.7	56.9
	4a	1.15	20.9	110.01	98.99	60.9	24.95	26	57.85	64.72	20.1	29	6.76	25.45	31.11	9.12	7.85	9.5	12.95	92.06	30	35.98	55.06
	5a	2.5	21	107.5	93.9	70.25	31.85	32.85	57.3	72.09	19.33	30.08	7.08	25.13	30.9	10.34	9.11	10.3	13.05	92.14	31.2	38	54.13
	6a	2.04	20.66	105	95.5	65.9	30.91	30	62.75	63	21	31.5	6.45	22	28.9	10	8.79	10.9	13	90.8	28.9	39.04	56.72
	7a	1.64	30.92	106	94.6	60.31	32.45	31.45	57.22	71.45	20.63	34.16	8.03	24.43	29.54	11.65	9.56	10.07	12.78	91	28.75	39.71	55
	8a	3.11	26.5	108.98	95.02	68.16	30.75	31.75	65.4	73.86	19.75	31.23	8	23.15	30	10.92	9.13	10.04	13.09	92.35	30	40.08	54.5
	9a	3.1	24.11	109	94	69.6	27.09	28.1	66.41	68.33	22.85	28.4	7.55	27.01	30	10.15	9.04	10.25	12	93	29.55	38.4	57.01
	10a	2.06	24.7	106.9	96.53	55.44	26.5	27.5	52.5	64.89	27.01	22.38	6.81	20.9	28.55	9.83	8.05	9.11	11.6	92.46	28.54	38.01	54
	1b	1.7	24	110	101	67	23	24	64	65	23	30.5	9	24	29	10	9	9.5	11.5	90.5	31	40	56
	2b	1.8	22	110.5	100	63	20.5	21.5	60	72	27	27	7.5	25	31	9.5	9	10.5	11.5	91	32	40	55
	3b	1.5	23	110	100	62.5	22	23	60	70.5	25	27.5	10.5	24	30	10	8	10	12	92.5	31	39	57
	4b	1	21	110	100	61	25	26	58	65	20	29	6.7	25.5	31	9	8	9.5	13	92	30	36	55
	5b	3	21	107	94	70	32	33	57	72	19	30	7	25	31	10	9	10	13	91	31	38	54.5
	6b	2	21	105	95	66	31	30	63	63	21	32	6.5	22	29	10	9	11	13	91	28	39	57
	7b	2	31	106	95	60	32.5	31.5	57	71	20	34	8	24.5	29.5	11.5	9.5	10	13	92	28.5	40	55
	8b	3	26	109	95	68	31	32	65.5	74	20	31	8	23	30	11	9	10	13	93	30	40	55
	9b	3	24	109	94	70	27	28	66.5	68	23	29	7.5	27	30	10	9	10.5	12	93	29	38	57
	10b	2	24.5	107	97	55.5	26.5	27.5	53	64.5	27	22.5	6.8	21	29	10	8	9.5	11.5	91	28	38	54
	1c	1.5	24	110	101	67	23	24	64	65	23	30	9	24	29	10	9	9.5	11.5	91	31	40	56
	2c	2	22	111	100	63	21	21	60	72	26	26.5	8	24.5	31	9.5	9	10.5	11.5	91	32	39.5	54.5
	3c	1.5	23	110	100.5	62.5	22	23	60	71	25	27.5	10.5	23.5	30	10	8	10	12	92.5	31	39	57
	4c	1	20.5	110	100	61	25	26	58	65	20	29	6.7	25	31	9	8	9.5	13	92	30	36	55
	5c	2.5	21	107.5	94	70	31.5	33	57	72	19	30	7	25	31	10.5	9	10.5	13	92.5	31	38	54.5
	6c	2	20.5	105	95	66	31	30	62.5	63	21	31.5	6.5	22	29	10	9	11	13	91	29	39	57
	7c	2	31	105	95	60	32.5	31	57	71.5	20	34	8	24.5	29.5	11.5	9.5	10	12.5	91	28.5	40	55
	8c	3	26	109	95	68	31	32	65.5	74	20	31	8	23	30	11	9	10	13	92.5	30	40.5	55
	9c	3	24	109	94	69.5	27	28	66.5	68.5	23	29	7.5	27	30	10.5	9	10	12	93	29	38.5	57
	10c	2	24.5	107	97	55	26.5	27.5	52.5	64.5	27	22.5	7	21	28.5	10	8	9	11.5	92.5	29	38	54.5
	(mm)	millimeter
	( ֯ )	degree
	1a-10a	software measurement
	1b-10b	manual measurement (first time)
	3c-10c	manual measurement (after a week)

## Sheet: Sheet2
	ICC	95% CI
		Lower	Upper
Q1	0.95	0.82	0.99
Q2	1	0.99	1
Q3	0.99	0.97	1
Q4	0.99	0.96	1
Q5	1	1	1
Q6	1	1	1
Q7	1	1	1
Q8	1	0.99	1
Q9	1	0.99	1
Q10	1	0.99	1
Q11	1	0.98	1
Q12	1	0.99	1
Q13	0.99	0.97	1
Q14	0.97	0.88	0.99
Q15	0.98	0.91	0.99
Q16	0.98	0.91	0.99
Q17	0.94	0.78	0.98
Q18	0.99	0.96	1
Q19	0.69	0.18	0.91
Q20	0.95	0.82	0.99
Q21	0.98	0.93	1
Q22	0.98	0.93	0.99
